# Supplementary material
Source: publisher figshare collection journal article supplement (https://acs.figshare.com/ndownloader/files/5217301)
Supplement: Supplementary file 1 [file 5217301]

data_vijay6m 
 
_audit_creation_method            SHELXL-97 
_chemical_name_systematic 
; 
 ? 
; 
_chemical_name_common             ? 
_chemical_formula_moiety          ? 
_chemical_formula_sum 
 'C20 H20 N2 O5' 
_chemical_formula_weight          368.38 
 
loop_ 
 _atom_type_symbol 
 _atom_type_description 
 _atom_type_scat_dispersion_real 
 _atom_type_scat_dispersion_imag 
 _atom_type_scat_source 
 'C'  'C'   0.0033   0.0016 
 'International Tables Vol C Tables 4.2.6.8 and 6.1.1.4' 
 'H'  'H'   0.0000   0.0000 
 'International Tables Vol C Tables 4.2.6.8 and 6.1.1.4' 
 'N'  'N'   0.0061   0.0033 
 'International Tables Vol C Tables 4.2.6.8 and 6.1.1.4' 
 'O'  'O'   0.0106   0.0060 
 'International Tables Vol C Tables 4.2.6.8 and 6.1.1.4' 
 
_symmetry_cell_setting            Orthorhombic 
_symmetry_space_group_name_H-M    P212121 
 
loop_ 
 _symmetry_equiv_pos_as_xyz 
 'x, y, z' 
 '-x+1/2, -y, z+1/2' 
 '-x, y+1/2, -z+1/2' 
 'x+1/2, -y+1/2, -z' 
 
_cell_length_a                    9.1575(14) 
_cell_length_b                    13.840(2) 
_cell_length_c                    14.879(2) 
_cell_angle_alpha                 90.00 
_cell_angle_beta                  90.00 
_cell_angle_gamma                 90.00 
_cell_volume                      1885.8(5) 
_cell_formula_units_Z             4 
_cell_measurement_temperature     273(2) 
_cell_measurement_reflns_used     ? 
_cell_measurement_theta_min       ? 
_cell_measurement_theta_max       ? 
 
_exptl_crystal_description        BLOCKS 
_exptl_crystal_colour             colourless 
_exptl_crystal_size_max           0.40 
_exptl_crystal_size_mid           0.35 
_exptl_crystal_size_min           0.28 
_exptl_crystal_density_meas       ? 
_exptl_crystal_density_diffrn     1.297 
_exptl_crystal_density_method     'not measured' 
_exptl_crystal_F_000              776 
_exptl_absorpt_coefficient_mu     0.094 
_exptl_absorpt_correction_type    SADABS 
_exptl_absorpt_correction_T_min   ? 
_exptl_absorpt_correction_T_max   ? 
 
_exptl_special_details 
; 
 ? 
; 
 
_diffrn_ambient_temperature       273(2) 
_diffrn_radiation_wavelength      0.71073 
_diffrn_radiation_type            MoK\a 
_diffrn_radiation_source          'fine-focus sealed tube' 
_diffrn_radiation_monochromator   graphite 
_diffrn_measurement_device_type   'BRUKER SMART APEX CCD DIFFRACTOMETER' 
_diffrn_measurement_method        'OMEGA-PHI SCAN' 
_diffrn_detector_area_resol_mean  ? 
_diffrn_standards_number          ? 
_diffrn_standards_interval_count  ? 
_diffrn_standards_interval_time   ? 
_diffrn_standards_decay_%         ? 
_diffrn_reflns_number             11472 
_diffrn_reflns_av_R_equivalents   0.0281 
_diffrn_reflns_av_sigmaI/netI     0.0267 
_diffrn_reflns_limit_h_min        -12 
_diffrn_reflns_limit_h_max        12 
_diffrn_reflns_limit_k_min        -18 
_diffrn_reflns_limit_k_max        17 
_diffrn_reflns_limit_l_min        -8 
_diffrn_reflns_limit_l_max        19 
_diffrn_reflns_theta_min          2.01 
_diffrn_reflns_theta_max          28.29 
_reflns_number_total              4369 
_reflns_number_gt                 3911 
_reflns_threshold_expression      >2sigma(I) 
 
_computing_data_collection        'BRUKER SMART' 
_computing_cell_refinement        'BRUKER SMART' 
_computing_data_reduction         'BRUKER SAINT' 
_computing_structure_solution     'SHELXS-97 (Sheldrick, 1990)' 
_computing_structure_refinement   'SHELXL-97 (Sheldrick, 1997)' 
_computing_molecular_graphics     'ORTEP, PLATON' 
_computing_publication_material   'SHELXL-97 (Sheldrick, 1997)' 
 
_refine_special_details 
; 
 Refinement of F^2^ against ALL reflections.  The weighted R-factor wR and 
 goodness of fit S are based on F^2^, conventional R-factors R are based 
 on F, with F set to zero for negative F^2^. The threshold expression of 
 F^2^ > 2sigma(F^2^) is used only for calculating R-factors(gt) etc. and is 
 not relevant to the choice of reflections for refinement.  R-factors based 
 on F^2^ are statistically about twice as large as those based on F, and R- 
 factors based on ALL data will be even larger. 
; 
 
_refine_ls_structure_factor_coef  Fsqd  
_refine_ls_matrix_type            full 
_refine_ls_weighting_scheme 
 'calc w=1/[\s^2^(Fo^2^)+(0.0628P)^2^+0.1813P] where P=(Fo^2^+2Fc^2^)/3' 
_atom_sites_solution_primary      direct 
_atom_sites_solution_secondary    difmap 
_atom_sites_solution_hydrogens    geom 
_refine_ls_hydrogen_treatment     mixed 
_refine_ls_extinction_method      SHELXL 
_refine_ls_extinction_coef        0.060(3) 
_refine_ls_extinction_expression 
 'Fc^*^=kFc[1+0.001xFc^2^\l^3^/sin(2\q)]^-1/4^' 
_refine_ls_abs_structure_details 
 'Flack H D (1983), Acta Cryst. A39, 876-881' 
_refine_ls_abs_structure_Flack    -0.4(10) 
_refine_ls_number_reflns          4369 
_refine_ls_number_parameters      247 
_refine_ls_number_restraints      0 
_refine_ls_R_factor_all           0.0473 
_refine_ls_R_factor_gt            0.0421 
_refine_ls_wR_factor_ref          0.1142 
_refine_ls_wR_factor_gt           0.1099 
_refine_ls_goodness_of_fit_ref    1.030 
_refine_ls_restrained_S_all       1.030 
_refine_ls_shift/su_max           0.000 
_refine_ls_shift/su_mean          0.000 
 
loop_ 
 _atom_site_label 
 _atom_site_type_symbol 
 _atom_site_fract_x 
 _atom_site_fract_y 
 _atom_site_fract_z 
 _atom_site_U_iso_or_equiv 
 _atom_site_adp_type 
 _atom_site_occupancy 
 _atom_site_calc_flag 
 _atom_site_refinement_flags 
 _atom_site_disorder_assembly 
 _atom_site_disorder_group 
N1 N 0.17926(14) 1.03826(10) 0.22130(9) 0.0458(3) Uani 1 d . . . 
C1 C 0.34310(15) 0.90657(11) 0.23382(9) 0.0393(3) Uani 1 d . . . 
C8 C 0.07024(15) 0.88354(11) 0.26884(10) 0.0412(3) Uani 1 d . . . 
O1 O -0.00357(13) 0.84659(10) 0.21092(9) 0.0606(3) Uani 1 d . . . 
O2 O -0.12103(14) 1.14046(11) 0.33962(10) 0.0686(4) Uani 1 d . . . 
O3 O 0.11979(13) 1.12826(9) 0.36400(8) 0.0558(3) Uani 1 d . . . 
C7 C 0.19627(15) 0.94908(10) 0.24092(9) 0.0378(3) Uani 1 d . . . 
C9 C 0.04565(15) 0.86767(11) 0.36646(10) 0.0414(3) Uani 1 d . . . 
C15 C -0.00161(18) 1.11683(11) 0.31673(12) 0.0494(4) Uani 1 d . . . 
C6 C 0.36168(17) 0.80726(12) 0.22777(12) 0.0485(4) Uani 1 d . . . 
H6 H 0.2813 0.7663 0.2308 0.058 Uiso 1 calc R . . 
O4 O -0.17130(15) 1.12343(11) 0.15906(11) 0.0741(4) Uani 1 d . . . 
C2 C 0.46601(18) 0.96534(14) 0.23258(14) 0.0600(4) Uani 1 d . . . 
H2 H 0.4557 1.0320 0.2372 0.072 Uiso 1 calc R . . 
N2 N 0.03045(14) 1.06985(10) 0.23561(10) 0.0498(3) Uani 1 d . . . 
C18 C -0.05607(19) 1.08392(13) 0.15877(13) 0.0544(4) Uani 1 d . . . 
C5 C 0.5010(2) 0.76949(15) 0.21719(13) 0.0629(5) Uani 1 d . . . 
H5 H 0.5130 0.7031 0.2110 0.075 Uiso 1 calc R . . 
C4 C 0.6196(2) 0.82782(19) 0.21568(14) 0.0703(6) Uani 1 d . . . 
H4 H 0.7122 0.8013 0.2086 0.084 Uiso 1 calc R . . 
O5 O 0.01104(16) 1.04707(11) 0.08763(9) 0.0701(4) Uani 1 d . . . 
C14 C 0.13691(17) 0.90949(12) 0.42986(11) 0.0491(4) Uani 1 d . . . 
H14 H 0.2153 0.9474 0.4115 0.059 Uiso 1 calc R . . 
C12 C -0.0046(3) 0.83915(17) 0.54758(14) 0.0755(6) Uani 1 d . . . 
H12 H -0.0225 0.8298 0.6085 0.091 Uiso 1 calc R . . 
C10 C -0.07050(19) 0.81065(14) 0.39480(14) 0.0573(4) Uani 1 d . . . 
H10 H -0.1318 0.7818 0.3528 0.069 Uiso 1 calc R . . 
C13 C 0.1109(2) 0.89469(16) 0.52095(13) 0.0660(5) Uani 1 d . . . 
H13 H 0.1721 0.9225 0.5636 0.079 Uiso 1 calc R . . 
C11 C -0.0943(2) 0.79716(16) 0.48507(16) 0.0725(6) Uani 1 d . . . 
H11 H -0.1722 0.7591 0.5040 0.087 Uiso 1 calc R . . 
C3 C 0.6036(2) 0.9251(2) 0.22448(17) 0.0766(6) Uani 1 d . . . 
H3 H 0.6856 0.9647 0.2250 0.092 Uiso 1 calc R . . 
C16 C 0.1026(3) 1.17355(17) 0.45150(14) 0.0698(5) Uani 1 d . . . 
H16A H 0.0381 1.1353 0.4890 0.084 Uiso 1 calc R . . 
H16B H 0.0608 1.2376 0.4449 0.084 Uiso 1 calc R . . 
C17 C 0.2489(3) 1.1798(2) 0.49266(15) 0.0877(7) Uani 1 d . . . 
H17A H 0.3154 1.2094 0.4510 0.132 Uiso 1 calc R . . 
H17B H 0.2827 1.1161 0.5073 0.132 Uiso 1 calc R . . 
H17C H 0.2437 1.2181 0.5464 0.132 Uiso 1 calc R . . 
C19 C -0.0668(3) 1.0530(2) 0.00224(16) 0.0830(7) Uani 1 d . . . 
H19A H -0.1264 1.1109 0.0013 0.100 Uiso 1 calc R . . 
H19B H 0.0030 1.0572 -0.0466 0.100 Uiso 1 calc R . . 
C20 C -0.1574(4) 0.9705(3) -0.0104(3) 0.1298(13) Uani 1 d . . . 
H20A H -0.2299 0.9682 0.0361 0.195 Uiso 1 calc R . . 
H20B H -0.0988 0.9130 -0.0080 0.195 Uiso 1 calc R . . 
H20C H -0.2045 0.9745 -0.0679 0.195 Uiso 1 calc R . . 
 
loop_ 
 _atom_site_aniso_label 
 _atom_site_aniso_U_11 
 _atom_site_aniso_U_22 
 _atom_site_aniso_U_33 
 _atom_site_aniso_U_23 
 _atom_site_aniso_U_13 
 _atom_site_aniso_U_12 
N1 0.0409(6) 0.0501(7) 0.0463(7) 0.0009(6) 0.0015(5) 0.0043(5) 
C1 0.0347(6) 0.0501(8) 0.0330(6) 0.0010(6) 0.0001(5) -0.0014(6) 
C8 0.0307(6) 0.0448(7) 0.0482(8) -0.0058(6) -0.0012(6) 0.0036(6) 
O1 0.0467(6) 0.0762(8) 0.0589(7) -0.0139(6) -0.0084(6) -0.0129(6) 
O2 0.0520(7) 0.0752(9) 0.0788(9) 0.0003(7) 0.0152(7) 0.0147(6) 
O3 0.0534(7) 0.0607(7) 0.0534(7) -0.0092(6) 0.0034(5) 0.0076(6) 
C7 0.0374(7) 0.0440(8) 0.0321(6) -0.0041(5) -0.0009(5) -0.0022(5) 
C9 0.0341(7) 0.0410(7) 0.0489(8) 0.0019(6) 0.0042(6) 0.0048(6) 
C15 0.0478(8) 0.0408(7) 0.0598(9) 0.0053(7) 0.0086(7) 0.0043(7) 
C6 0.0435(8) 0.0501(9) 0.0518(9) 0.0044(7) 0.0007(7) 0.0034(6) 
O4 0.0546(7) 0.0785(9) 0.0891(10) -0.0048(8) -0.0160(7) 0.0146(7) 
C2 0.0441(9) 0.0592(10) 0.0767(12) -0.0018(9) 0.0023(8) -0.0090(7) 
N2 0.0430(7) 0.0479(7) 0.0584(8) -0.0012(6) -0.0012(6) 0.0081(5) 
C18 0.0483(8) 0.0475(8) 0.0674(11) 0.0012(8) -0.0072(8) 0.0006(7) 
C5 0.0600(10) 0.0656(10) 0.0630(10) 0.0043(9) 0.0015(9) 0.0217(9) 
C4 0.0426(9) 0.1040(17) 0.0642(12) 0.0022(11) 0.0029(9) 0.0204(10) 
O5 0.0693(9) 0.0801(9) 0.0610(8) -0.0069(7) -0.0167(7) 0.0158(8) 
C14 0.0449(8) 0.0548(9) 0.0475(8) 0.0016(7) 0.0007(7) -0.0013(7) 
C12 0.0853(15) 0.0885(14) 0.0527(10) 0.0159(10) 0.0179(11) 0.0080(13) 
C10 0.0455(9) 0.0572(10) 0.0693(11) 0.0013(9) 0.0044(8) -0.0049(8) 
C13 0.0708(11) 0.0808(14) 0.0464(9) 0.0017(9) -0.0026(9) 0.0041(10) 
C11 0.0664(12) 0.0702(13) 0.0807(14) 0.0162(11) 0.0266(11) -0.0057(10) 
C3 0.0370(9) 0.1021(17) 0.0907(15) 0.0000(14) 0.0043(10) -0.0134(10) 
C16 0.0825(13) 0.0722(12) 0.0548(10) -0.0118(9) 0.0116(10) 0.0062(10) 
C17 0.0965(18) 0.1124(19) 0.0542(11) -0.0157(12) -0.0017(12) -0.0159(15) 
C19 0.0820(15) 0.1023(18) 0.0646(12) -0.0027(12) -0.0200(11) 0.0061(13) 
C20 0.141(3) 0.130(3) 0.119(3) -0.012(2) -0.044(2) -0.030(2) 
 
_geom_special_details 
; 
 All esds (except the esd in the dihedral angle between two l.s. planes) 
 are estimated using the full covariance matrix.  The cell esds are taken 
 into account individually in the estimation of esds in distances, angles 
 and torsion angles; correlations between esds in cell parameters are only 
 used when they are defined by crystal symmetry.  An approximate (isotropic) 
 treatment of cell esds is used for estimating esds involving l.s. planes. 
; 
 
loop_ 
 _geom_bond_atom_site_label_1 
 _geom_bond_atom_site_label_2 
 _geom_bond_distance 
 _geom_bond_site_symmetry_2 
 _geom_bond_publ_flag 
N1 C7 1.2779(19) . ? 
N1 N2 1.4469(17) . ? 
C1 C6 1.388(2) . ? 
C1 C2 1.389(2) . ? 
C1 C7 1.4715(19) . ? 
C8 O1 1.2088(18) . ? 
C8 C9 1.486(2) . ? 
C8 C7 1.526(2) . ? 
O2 C15 1.191(2) . ? 
O3 C15 1.325(2) . ? 
O3 C16 1.453(2) . ? 
C9 C14 1.387(2) . ? 
C9 C10 1.390(2) . ? 
C15 N2 1.402(2) . ? 
C6 C5 1.388(2) . ? 
O4 C18 1.188(2) . ? 
C2 C3 1.383(3) . ? 
N2 C18 1.405(2) . ? 
C18 O5 1.326(2) . ? 
C5 C4 1.353(3) . ? 
C4 C3 1.360(3) . ? 
O5 C19 1.459(3) . ? 
C14 C13 1.391(3) . ? 
C12 C13 1.367(3) . ? 
C12 C11 1.370(3) . ? 
C10 C11 1.373(3) . ? 
C16 C17 1.476(3) . ? 
C19 C20 1.424(4) . ? 
 
loop_ 
 _geom_angle_atom_site_label_1 
 _geom_angle_atom_site_label_2 
 _geom_angle_atom_site_label_3 
 _geom_angle 
 _geom_angle_site_symmetry_1 
 _geom_angle_site_symmetry_3 
 _geom_angle_publ_flag 
C7 N1 N2 111.90(13) . . ? 
C6 C1 C2 118.67(14) . . ? 
C6 C1 C7 120.84(13) . . ? 
C2 C1 C7 120.48(14) . . ? 
O1 C8 C9 123.33(14) . . ? 
O1 C8 C7 118.72(14) . . ? 
C9 C8 C7 117.95(12) . . ? 
C15 O3 C16 115.84(14) . . ? 
N1 C7 C1 118.77(13) . . ? 
N1 C7 C8 122.97(13) . . ? 
C1 C7 C8 118.23(12) . . ? 
C14 C9 C10 119.46(16) . . ? 
C14 C9 C8 120.78(14) . . ? 
C10 C9 C8 119.76(15) . . ? 
O2 C15 O3 125.85(16) . . ? 
O2 C15 N2 124.46(17) . . ? 
O3 C15 N2 109.67(13) . . ? 
C5 C6 C1 119.54(16) . . ? 
C3 C2 C1 120.23(18) . . ? 
C15 N2 C18 121.22(13) . . ? 
C15 N2 N1 117.65(13) . . ? 
C18 N2 N1 116.96(14) . . ? 
O4 C18 O5 126.26(18) . . ? 
O4 C18 N2 124.17(18) . . ? 
O5 C18 N2 109.57(14) . . ? 
C4 C5 C6 121.00(18) . . ? 
C5 C4 C3 120.13(18) . . ? 
C18 O5 C19 116.56(17) . . ? 
C9 C14 C13 119.88(16) . . ? 
C13 C12 C11 120.39(19) . . ? 
C11 C10 C9 119.69(19) . . ? 
C12 C13 C14 119.8(2) . . ? 
C12 C11 C10 120.74(19) . . ? 
C4 C3 C2 120.36(19) . . ? 
O3 C16 C17 107.37(17) . . ? 
C20 C19 O5 110.8(3) . . ? 
 
_diffrn_measured_fraction_theta_max    0.956 
_diffrn_reflns_theta_full              28.29 
_diffrn_measured_fraction_theta_full   0.956 
_refine_diff_density_max    0.211 
_refine_diff_density_min   -0.190 
_refine_diff_density_rms    0.037 
